# Supplementary material for: Fission Yeast CSL Transcription Factors: Mapping Their Target Genes and Biological Roles
Source: PubMed Central journal article supplement (PMC4569565; doi:10.1371/journal.pone.0137820), 2015-09-14

A

1

2

3

4

5

6

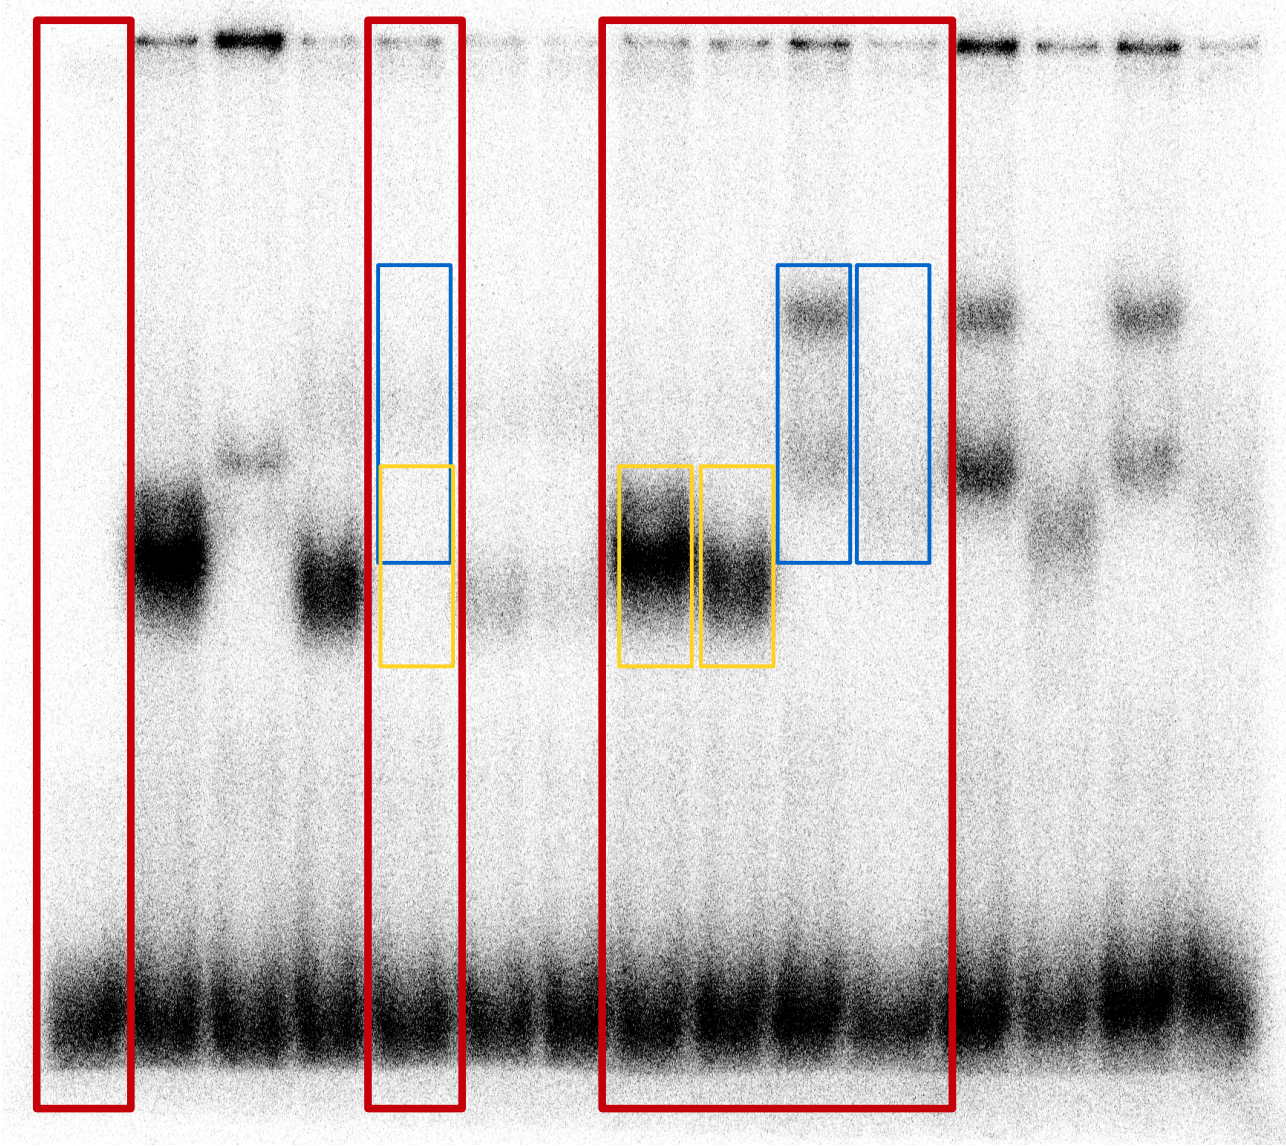

**B**

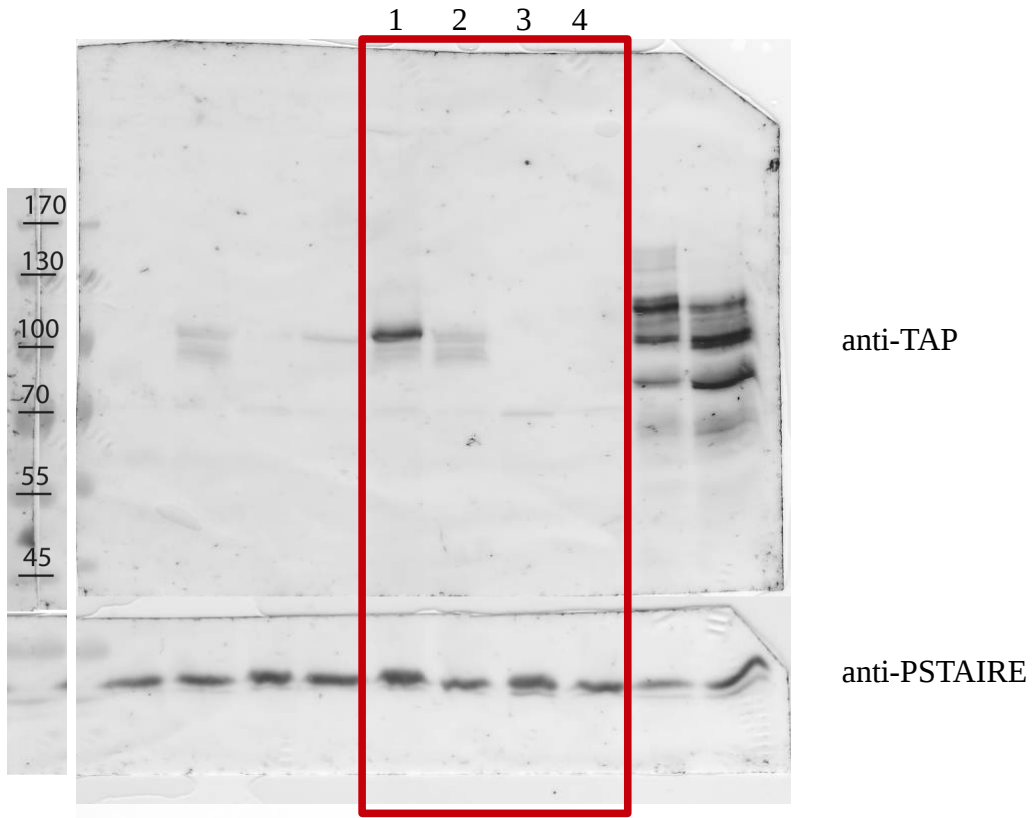

C

top panel

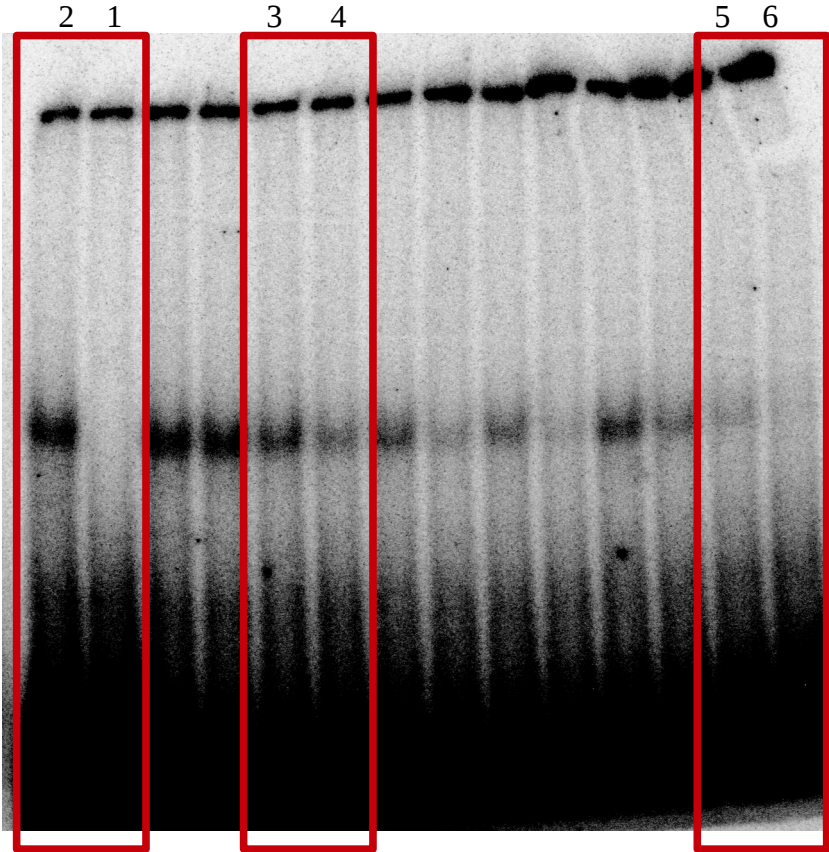

bottom panel

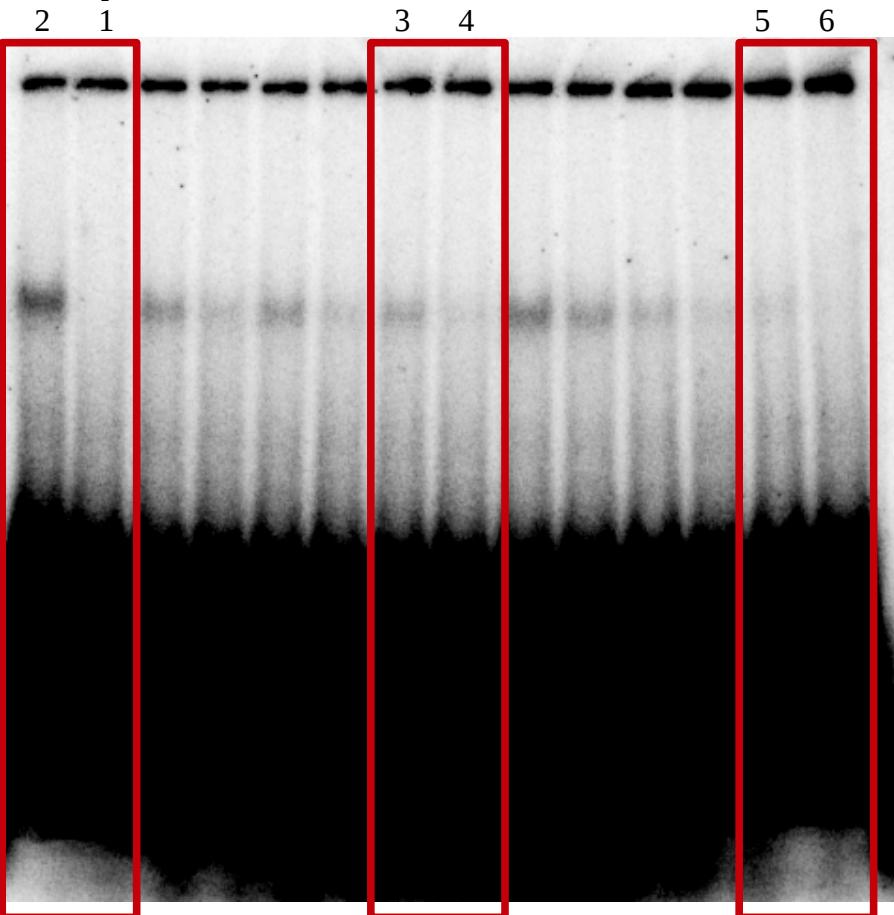

Supplement: pone.0137820.s006.pdf [file pone.0137820.s006.pdf]
