# Supplementary material for: Fission Yeast CSL Transcription Factors: Mapping Their Target Genes and Biological Roles
Source: PLoS One. 2015 Sep 14;10(9):e0137820. doi: 10.1371/journal.pone.0137820 (PMC4569565; doi:10.1371/journal.pone.0137820)
Supplement: S3 Table — (XLS) [file pone.0137820.s009.xls]

## Sheet: List1
S3 Table. Plasmids used in this study.
ID	Description	Source
pJR2-3XU		[32]
pMP78	cbf11 cDNA cloned into pJR2-3XU (NotI/PstI)	this study
pMP80	cbf12 cDNA cloned into pJR2-3XU (NotI/PstI)	this study
pMP91	cbf11 targeting plasmid with pCloneNAT1 backbone	this study
