# Supplementary material for: Fission Yeast CSL Transcription Factors: Mapping Their Target Genes and Biological Roles
Source: PLoS One. 2015 Sep 14;10(9):e0137820. doi: 10.1371/journal.pone.0137820 (PMC4569565; doi:10.1371/journal.pone.0137820)
Supplement: S6 Table — (XLS) [file pone.0137820.s012.xls]

## Sheet: List1
S6 Table. Clusters of genes showing differential expression in CSL deletion or overexpression (from Fig. 1A).
Cluster 1
Systematic ID	Primary name	Product
SPAC13A11.06	SPAC13A11.06	pyruvate decarboxylase (predicted)
SPAC13G7.02c	ssa1	heat shock protein Ssa1 (predicted)
SPAC15A10.05c	mug182	YjeF family pyridoxamine-phosphate oxidase (predicted)
SPAC167.06c	mug143	sequence orphan
SPAC1751.01c	gti1	gluconate transporter inducer Gti1
SPAC19B12.10	sst2	human AMSH/STAMBP protein homolog, ubiquitin specific-protease
SPAC19D5.01	pyp2	tyrosine phosphatase Pyp2
SPAC22F3.12c	rgs1	regulator of G-protein signaling Rgs1
SPAC23C11.06c	SPAC23C11.06c	hydrolase (inferred_from_context)
SPAC3C7.05c	mug191	alpha-1,6- mannanase (predicted)
SPAC4H3.04c	SPAC4H3.04c	UPF0103 family
SPAC637.03	SPAC637.03	conserved fungal protein
SPAC750.05c	SPAC750.05c	S. pombe specific 5Tm protein family
SPAC977.01	SPAC977.01	S. pombe specific 5Tm protein family
SPAC977.06	SPAC977.06	S. pombe specific DUF999 family protein 3
SPACUNK4.17	SPACUNK4.17	NAD binding dehydrogenase family protein
SPAPB24D3.07c	SPAPB24D3.07c	sequence orphan
SPBC16A3.13	meu7	alpha-amylase homolog Aah4
SPBC1711.11	SPBC1711.11	autophagy associated protein (predicted)
SPBC1773.12	SPBC1773.12	transcription factor (predicted)
SPBC1773.13	SPBC1773.13	aromatic aminotransferase (predicted)
SPBC216.02	mcp5	cortical anchoring factor for dynein Mcp5/Num1
SPBC21D10.06c	map4	cell surface agglutination protein Map4
SPBC24C6.09c	SPBC24C6.09c	phosphoketolase family protein (predicted)
SPBC32F12.03c	gpx1	glutathione peroxidase Gpx1
SPBP26C9.03c	fet4	iron/zinc ion transporter (predicted)
SPBP4H10.10	SPBP4H10.10	rhomboid family protease
SPBPB2B2.12c	gal10	UDP-glucose 4-epimerase/aldose 1-epimerase Gal10
SPBPB2B2.13	gal1	galactokinase Gal1
SPBPB2B2.19c	SPBPB2B2.19c	S. pombe specific 5Tm protein family
SPCC1281.04	SPCC1281.04	pyridoxal reductase (predicted)
SPCC1393.07c	mug4	sequence orphan
SPCC1393.12	SPCC1393.12	sequence orphan
SPCC1442.01	ste6	guanyl-nucleotide exchange factor Ste6
SPCC1450.09c	SPCC1450.09c	phospholipase (predicted)
SPCC1742.01	SPCC1742.01	sequence orphan
SPCC191.11	inv1	beta-fructofuranosidase
SPCC338.12	pbi2	proteinase B inhibitor Pbi2 (predicted)
SPCC548.07c	ght1	hexose transporter Ght1
Cluster 2
Systematic ID	Primary name	Product
SPAC139.05	SPAC139.05	succinate-semialdehyde dehydrogenase (predicted)
SPAC15E1.02c	SPAC15E1.02c	DUF1761 family protein
SPAC22A12.17c	SPAC22A12.17c	short chain dehydrogenase (predicted)
SPAC27D7.09c	SPAC27D7.09c	But2 family protein
SPAC343.12	rds1	conserved fungal protein
SPAC3G9.11c	SPAC3G9.11c	pyruvate decarboxylase (predicted)
SPAC4H3.03c	SPAC4H3.03c	glucan 1,4-alpha-glucosidase (predicted)
SPAC4H3.08	SPAC4H3.08	3-hydroxyacyl-CoA dehydrogenase (predicted)
SPAP8A3.04c	hsp9	heat shock protein Hsp9
SPAPB1A11.03	SPAPB1A11.03	cytochrome b2 (L-lactate cytochrome-c oxidoreductase) (predicted)
SPBC16A3.02c	SPBC16A3.02c	mitochondrial conserved protein (predicted)
SPBC16D10.08c	SPBC16D10.08c	heat shock protein Hsp104 (predicted)
SPBC365.12c	ish1	LEA domain protein
SPBC3E7.02c	hsp16	heat shock protein Hsp16
SPBC660.05	SPBC660.05	conserved fungal protein
SPBC725.03	SPBC725.03	pyridoxamine 5'-phosphate oxidase (predicted)
SPBC725.10	SPBC725.10	tspO homolog/ peripheral benzodiazepine receptor homolog, involved in the transport cytoplas/mitochondrial of haem (predicted)
SPCC191.01	SPCC191.01	sequence orphan
SPCC338.18	SPCC338.18	sequence orphan
SPCPB16A4.06c	SPCPB16A4.06c	sequence orphan
Cluster 3
Systematic ID	Primary name	Product
SPAC19G12.09	SPAC19G12.09	NADH/NADPH dependent indole-3-acetaldehyde reductase AKR3C2
SPAC22F8.05	SPAC22F8.05	alpha,alpha-trehalose-phosphate synthase (predicted)
SPAC3C7.14c	obr1	ubiquitinated histone-like protein Uhp1
SPAC9E9.11	plr1	pyridoxal reductase Plr1
SPAPB24D3.08c	SPAPB24D3.08c	NADP-dependent oxidoreductase (predicted)
SPAPJ691.02	SPAPJ691.02	yippee-like protein
SPBC106.02c	srx1	sulfiredoxin
SPBC119.03	SPBC119.03	human COMT homolog 1
SPBC19C7.04c	SPBC19C7.04c	conserved fungal protein
SPBC215.11c	SPBC215.11c	aldo/keto reductase, unknown biological role
SPBC21C3.19	SPBC21C3.19	SBDS family protein Rtc3 (predicted)
SPBC23G7.10c	SPBC23G7.10c	NADH-dependent flavin oxidoreductase (predicted)
SPBC2A9.02	SPBC2A9.02	NAD dependent epimerase/dehydratase family protein
SPBC359.06	mug14	adducin
SPBC56F2.06	mug147	sequence orphan
SPBC609.04	caf5	spermine family transmembrane transporter Caf5
SPBPB21E7.01c	eno102	enolase (predicted)
SPBPB2B2.08	SPBPB2B2.08	conserved fungal protein
SPCC1739.08c	SPCC1739.08c	short chain dehydrogenase (predicted)
SPCC18B5.02c	SPCC18B5.02c	cinnamoyl-CoA reductase pseudogene
SPCC663.06c	SPCC663.06c	short chain dehydrogenase (predicted)
SPCC663.08c	SPCC663.08c	short chain dehydrogenase
SPCC737.04	SPCC737.04	S. pombe specific UPF0300 family protein 6
SPCC757.07c	ctt1	catalase
SPCC965.07c	gst2	glutathione S-transferase Gst2
Cluster 4
Systematic ID	Primary name	Product
SPAC10F6.06	vip1	RNA-binding protein Vip1
SPAC11D3.13	SPAC11D3.13	ThiJ domain protein
SPAC17G6.13	slt1	sequence orphan Slt1
SPAC1B3.03c	wis2	cyclophilin family peptidyl-prolyl cis-trans isomerase Wis2
SPAC1F7.07c	fip1	iron permease Fip1
SPAC1F7.08	fio1	iron transport multicopper oxidase Fio1
SPAC1F7.12	yak3	aldose reductase ARK13 family YakC
SPAC20G4.03c	hri1	eIF2 alpha kinase Hri1
SPAC22G7.11c	SPAC22G7.11c	conserved fungal protein
SPAC22H12.01c	mug35	sequence orphan
SPAC23D3.05c	SPAC23D3.05c	alcohol dehydrogenase pseudogene
SPAC23G3.03	sib2	ornithine N5 monooxygenase (predicted)
SPAC26F1.04c	etr1	enoyl-[acyl-carrier protein] reductase (predicted)
SPAC26F1.07	SPAC26F1.07	glucose 1-dehydrogenase (NADP+) (predicted)
SPAC26F1.14c	aif1	apoptosis-inducing factor homolog Aif1 (predicted)
SPAC26H5.08c	bgl2	glucan beta-glucosidase Bgl2 (predicted)
SPAC26H5.09c	SPAC26H5.09c	gfo/idh/mocA family oxidoreductase (predicted)
SPAC27D7.11c	SPAC27D7.11c	But2 family protein
SPAC2E1P3.01	SPAC2E1P3.01	dehydrogenase (predicted)
SPAC2F3.05c	SPAC2F3.05c	xylose and arabinose reductase (predicted)
SPAC2H10.01	SPAC2H10.01	transcription factor, zf-fungal binuclear cluster type (predicted)
SPAC328.03	tps1	alpha,alpha-trehalose-phosphate synthase
SPAC32A11.02c	SPAC32A11.02c	conserved fungal protein
SPAC3A11.10c	SPAC3A11.10c	dipeptidyl peptidase (predicted)
SPAC3A12.18	zwf1	glucose-6-phosphate 1-dehydrogenase (predicted)
SPAC4A8.04	isp6	vacuolar serine protease Isp6
SPAC4D7.02c	SPAC4D7.02c	glycerophosphoryl diester phosphodiesterase (predicted)
SPAC4F10.20	grx1	glutaredoxin Grx1
SPAC4F8.07c	hxk2	hexokinase 2
SPAC513.02	SPAC513.02	phosphoglycerate mutase family
SPAC513.06c	SPAC513.06c	dihydrodiol dehydrogenase (predicted)
SPAC513.07	SPAC513.07	flavonol reductase/cinnamoyl-CoA reductase family
SPAC5H10.02c	SPAC5H10.02c	ThiJ domain protein
SPAC688.04c	gst3	glutathione S-transferase Gst3
SPAC750.01	SPAC750.01	aldo/keto reductase family protein
SPAC750.08c	SPAC750.08c	NAD-dependent malic enzyme (predicted), partial
SPAC8C9.03	cgs1	cAMP-dependent protein kinase regulatory subunit Cgs1
SPAC926.04c	hsp90	Hsp90 chaperone
SPAC977.14c	SPAC977.14c	aldo/keto reductase, unknown biological role
SPBC1105.14	rsv2	transcription factor Rsv2
SPBC1198.14c	fbp1	fructose-1,6-bisphosphatase Fbp1
SPBC11C11.06c	SPBC11C11.06c	sequence orphan
SPBC1271.05c	SPBC1271.05c	zf-AN1 type zinc finger protein
SPBC12C2.04	SPBC12C2.04	NAD binding dehydrogenase family protein
SPBC14F5.04c	pgk1	phosphoglycerate kinase Pgk1 (predicted)
SPBC14F5.10c	SPBC14F5.10c	ubiquitin-protein ligase E3 (predicted)
SPBC1604.01	mug158	ergothioneine biosynthesis protein (predicted)
SPBC1683.09c	frp1	ferric-chelate reductase Frp1
SPBC1711.08	SPBC1711.08	chaperone activator Aha1 (predicted)
SPBC1773.06c	SPBC1773.06c	alcohol dehydrogenase (predicted)
SPBC17D11.08	SPBC17D11.08	WD repeat protein, DDB1 and CUL4-associated factor 7 (predicted)
SPBC18H10.05	SPBC18H10.05	WD repeat protein, human WDR44 family
SPBC215.05	gpd1	glycerol-3-phosphate dehydrogenase Gpd1
SPBC29A10.08	gas2	1,3-beta-glucanosyltransferase Gas2 (predicted)
SPBC30D10.14	SPBC30D10.14	dienelactone hydrolase family (predicted)
SPBC32H8.02c	nep2	NEDD8 protease Nep2
SPBC32H8.07	git5	heterotrimeric G protein beta subunit Git5
SPBC337.08c	ubi4	ubiquitin
SPBC428.11	SPBC428.11	homocysteine synthase Met17
SPBC4F6.09	str1	siderophore-iron transporter Str1
SPBC4F6.17c	SPBC4F6.17c	mitochondrial heatshock protein Hsp78 (predicted)
SPBC609.01	SPBC609.01	ribonuclease II (RNB) family
SPBC660.07	ntp1	alpha,alpha-trehalase Ntp1
SPBC660.09	mug168	sequence orphan
SPBC8E4.04	SPBC8E4.04	aldo/keto reductase involved in pentose catabolism (predicted)
SPBP23A10.12	frg1	FRG1 family protein, involved in mRNA processing (predicted)
SPBP4H10.12	SPBP4H10.12	conserved protein
SPBPB2B2.01	SPBPB2B2.01	amino acid permease (predicted)
SPBPB2B2.05	SPBPB2B2.05	peptidase family C26 protein
SPCC1223.09	SPCC1223.09	uricase (predicted)
SPCC1235.01	SPCC1235.01	sequence orphan
SPCC1281.07c	SPCC1281.07c	glutathione S-transferase (predicted)
SPCC132.04c	gdh2	NAD-dependent glutamate dehydrogenase Gdh2 (predicted)
SPCC1322.08	srk1	MAPK-activated protein kinase Srk1
SPCC1442.16c	zta1	NADPH quinone oxidoreductase/ARE-binding protein (predicted)
SPCC162.04c	wtf13	wtf element Wtf13
SPCC16A11.15c	SPCC16A11.15c	sequence orphan
SPCC1739.06c	SPCC1739.06c	uroporphyrin methyltransferase (predicted)
SPCC18B5.01c	bfr1	brefeldin A efflux transporter Bfr1
SPCC1906.04	wtf20	wtf element Wtf20
SPCC191.09c	gst1	glutathione S-transferase Gst1
SPCC330.06c	SPCC330.06c	thioredoxin peroxidase (predicted)
SPCC4G3.03	SPCC4G3.03	WD40/YVTN repeat-like protein
SPCC550.07	SPCC550.07	acetamidase (predicted)
SPCC569.05c	SPCC569.05c	spermidine family transporter (predicted)
SPCC70.04c	SPCC70.04c	sequence orphan
SPCC736.07c	SPCC736.07c	unconventional prefoldin involved in translation initiation (predicted)
SPCC757.03c	SPCC757.03c	ThiJ domain protein
SPCC794.01c	SPCC794.01c	glucose-6-phosphate 1-dehydrogenase (predicted)
SPCC794.02	wtf5	wtf element Wtf5
SPCC794.12c	mae2	malic enzyme, malate dehydrogenase (oxaloacetate decarboxylating), Mae2
SPCC830.07c	psi1	DNAJ domain protein, involved in translation initiation Psi1
SPCP31B10.06	mug190	C2 domain protein
Cluster 5a
Systematic ID	Primary name	Product
SPAC105.03c	SPAC105.03c	transcription factor (predicted)
SPAC11D3.01c	SPAC11D3.01c	conserved fungal protein
SPAC11G7.06c	mug132	S. pombe specific UPF0300 family protein 3
SPAC139.03	SPAC139.03	transcription factor, zf-fungal binuclear cluster type (predicted)
SPAC13C5.06c	mug121	sequence orphan
SPAC144.04c	spe1	ornithine decarboxylase Spe1 (predicted)
SPAC1635.01	SPAC1635.01	mitochondrial outer membrane voltage-dependent anion-selective channel (predicted)
SPAC1687.16c	erg31	C-5 sterol desaturase Erg31
SPAC17A2.12	SPAC17A2.12	ATP-dependent DNA helicase (predicted)
SPAC17G6.03	SPAC17G6.03	phosphoprotein phosphatase (predicted)
SPAC1952.13	ned1	lipin Ned1
SPAC19G12.10c	cpy1	vacuolar carboxypeptidase Y
SPAC1B1.01	deb1	transcription factor Deb1/Rdp1
SPAC1B2.05	mcm5	MCM complex subunit Mcm5
SPAC1B3.15c	SPAC1B3.15c	vigtamin H transporter (predicted)
SPAC1F5.09c	shk2	PAK-related kinase Shk2
SPAC1F8.04c	SPAC1F8.04c	hydrolase (predicted)
SPAC20H4.11c	rho5	Rho family GTPase Rho5
SPAC212.04c	SPAC212.04c	S. pombe specific DUF999 family protein 1
SPAC24C9.08	SPAC24C9.08	vacuolar carboxypeptidase (predicted)
SPAC24H6.08	SPAC24H6.08	sequence orphan
SPAC25B8.04c	mss51	mitochondrial splicing suppressor Mss51 (predicted)
SPAC25G10.02	cce1	mitochondrial cruciform cutting endonuclease Cce1
SPAC29A4.14c	SPAC29A4.14c	peroxin-3 peroxisome import protein (predicted)
SPAC2F3.10	vps54	GARP complex subunit Vps54 (predicted)
SPAC2F3.15	lsk1	P-TEFb-associated cyclin-dependent protein kinase Lsk1
SPAC30D11.01c	SPAC30D11.01c	alpha-glucosidase (predicted)
SPAC4D7.03	pop2	F-box/WD repeat protein Pop2
SPAC4F10.08	mug126	sequence orphan
SPAC4H3.02c	swc3	Swr1 complex subunit Swc3
SPAC57A10.08c	SPAC57A10.08c	carboxylic ester hydrolase activity (predicted)
SPAC688.13	scn1	TatD DNase family Scn1
SPAC6F12.06	SPAC6F12.06	Rho GDP dissociation inhibitor Rdi1 (predicted)
SPAC6G9.04	spo7	sporulation protein Spo7
SPAC750.07c	SPAC750.07c	S. pombe specific GPI anchored protein family 1
SPAC869.02c	SPAC869.02c	nitric oxide dioxygenase (predicted)
SPAPB18E9.04c	SPAPB18E9.04c	sequence orphan
SPAPB1E7.06c	eme1	Holliday junction resolvase subunit Eme1
SPAPB24D3.10c	agl1	alpha-glucosidase Agl1
SPBC106.17c	cys2	homoserine O-acetyltransferase (predicted)
SPBC1105.13c	SPBC1105.13c	sequence orphan
SPBC11B10.08	SPBC11B10.08	conserved fungal protein
SPBC1271.09	SPBC1271.09	glycerophosphodiester transporter (predicted)
SPBC12C2.03c	SPBC12C2.03c	methionine synthase reductase (predicted)
SPBC15D4.02	SPBC15D4.02	transcription factor, zf-fungal binuclear cluster type (predicted)
SPBC1683.01	SPBC1683.01	inorganic phosphate transporter (predicted)
SPBC1685.13	fhn1	Fhn1 plasma membrane organization protein
SPBC1709.14	SPBC1709.14	peptide N-glycanase (predicted)
SPBC1734.07c	SPBC1734.07c	TRAPP complex subunit Trs85 (predicted)
SPBC1773.05c	tms1	hexitol dehydrogenase (predicted)
SPBC1778.03c	SPBC1778.03c	NADH pyrophosphatase (predicted)
SPBC1D7.05	byr2	MAP kinase kinase kinase Byr2
SPBC1E8.05	SPBC1E8.05	conserved fungal protein
SPBC25B2.08	SPBC25B2.08	sequence orphan
SPBC25B2.10	SPBC25B2.10	Usp (universal stress protein) family protein
SPBC29A10.02	spo5	meiotic RNA-binding protein 1
SPBC29A10.03c	pcf1	CAF assembly factor (CAF-1) complex large subunit Pcf1
SPBC30B4.06c	SPBC30B4.06c	mitochondrial GIDA family tRNA uridine 5-carboxymethylaminomethyl modification enzyme (predicted)
SPBC32F12.10	SPBC32F12.10	phosphoglucomutase (predicted)
SPBC32H8.13c	mok12	alpha-1,3-glucan synthase Mok12
SPBC354.13	rga6	Rho-type GTPase activating protein Rga6 (predicted)
SPBC36.02c	SPBC36.02c	spermidine family transporter (predicted)
SPBC365.02c	cox10	protoheme IX farnesyltransferase (predicted)
SPBC3H7.02	SPBC3H7.02	sulfate transporter (predicted)
SPBC409.13	SPBC409.13	6,7-dimethyl-8-ribityllumazine synthase (predicted)
SPBC428.10	SPBC428.10	sequence orphan
SPBC4B4.02c	nca2	mitochondrial protein Nca2 (predicted)
SPBC4B4.08	ght2	hexose transporter Ght2
SPBC660.06	SPBC660.06	conserved fungal protein
SPBC776.03	SPBC776.03	homoserine dehydrogenase (predicted)
SPBC8D2.16c	SPBC8D2.16c	DUF171 family protein
SPBC8E4.02c	SPBC8E4.02c	sequence orphan
SPBC947.10	dsc1	ubiquitin-protein ligase E3 (predicted)
SPBP35G2.12	SPBP35G2.12	ADP-ribose diphosphatase, NudF subfamily (predicted)
SPBPB2B2.11	SPBPB2B2.11	nucleotide-sugar 4,6-dehydratase (predicted)
SPCC1020.10	oca2	serine/threonine protein kinase Oca2
SPCC1183.11	SPCC1183.11	MS ion channel protein 1 (predicted)
SPCC1223.03c	gut2	glycerol-3-phosphate dehydrogenase Gut2 (predicted)
SPCC1235.08c	pdh1	DUF1751 family protein
SPCC1235.14	ght5	hexose transporter Ght5
SPCC126.14	prp18	U5 snRNP-associated protein Prp18 (predicted)
SPCC1281.08	wtf11	wtf element Wtf11
SPCC1442.02	SPCC1442.02	central kinetochore associated family protein (predicted)
SPCC1494.03	arz1	armadillo repeat containing, Zfs1 target number 1
SPCC162.10	ppk33	serine/threonine protein kinase Ppk33 (predicted)
SPCC1840.12	SPCC1840.12	OPT oligopeptide transporter family protein (predicted)
SPCC306.08c	SPCC306.08c	malate dehydrogenase (predicted)
SPCC4G3.12c	SPCC4G3.12c	ubiquitin-protein ligase E3 (predicted)
SPCC569.07	SPCC569.07	aromatic aminotransferase (predicted)
SPCC576.02	SPCC576.02	hydantoin racemase family (predicted)
SPCC61.05	SPCC61.05	S. pombe specific multicopy membrane protein family 1
SPCC622.15c	SPCC622.15c	sequence orphan
SPCC794.04c	SPCC794.04c	membrane transporter (predicted)
SPCC970.01	rad16	DNA repair endonuclease XPF
SPNCRNA.133	SPNCRNA.133	non-coding RNA (predicted)
SPNCRNA.134	SPNCRNA.134	non-coding RNA (predicted)
SPNCRNA.52	prl52	non-coding RNA, poly(A) bearing (predicted)
Cluster 5b
Systematic ID	Primary name	Product
SPAC1039.01	SPAC1039.01	amino acid permease (predicted)
SPAC1039.09	isp5	amino acid permease Isp5
SPAC11D3.02c	SPAC11D3.02c	ELLA family acetyltransferase (predicted)
SPAC11D3.18c	SPAC11D3.18c	nicotinic acid plasma membrane transporter (predicted)
SPAC1782.07	qcr8	ubiquinol-cytochrome-c reductase complex subunit 7
SPAC17A2.02c	SPAC17A2.02c	DUF887 family protein
SPAC1B3.16c	vht1	vitamin H transporter Vth1
SPAC23D3.12	SPAC23D3.12	inorganic phosphate transporter (predicted)
SPAC25A8.03c	SPAC25A8.03c	DUF185 protein, mitochondrial
SPAC25B8.13c	isp7	2-OG-Fe(II) oxygenase superfamily protein
SPAC27D7.03c	mei2	RNA-binding protein involved in meiosis Mei2
SPAC29B12.10c	pgt1	glutathione transporter Pgt1
SPAC3A11.07	SPAC3A11.07	NADH dehydrogenase (predicted)
SPAC3G6.05	SPAC3G6.05	Mpv17/PMP22 family protein 1 (predicted)
SPAC4G9.22	SPAC4G9.22	conserved fungal protein
SPAC5H10.06c	adh4	alcohol dehydrogenase Adh4
SPAC5H10.07	SPAC5H10.07	sequence orphan
SPAC644.15	rpp101	60S acidic ribosomal protein Rpp1-1
SPAC694.03	SPAC694.03	conserved fungal protein
SPAC821.09	eng1	endo-1,3-beta-glucanase Eng1
SPAC869.05c	SPAC869.05c	sulfate transporter (predicted)
SPAC869.07c	mel1	alpha-galactosidase, melibiase
SPAC869.10c	put4	proline specific plasma membrane permease Put4 (predicted)
SPAC977.17	SPAC977.17	MIP water channel (predicted)
SPAPB15E9.01c	SPAPB15E9.01c	sequence orphan
SPAPB1A10.14	SPAPB1A10.14	F-box protein (predicted)
SPAPJ691.03	SPAPJ691.03	mitochondrial conserved eukaryotic protein
SPBC119.11c	pac1	double-strand-specific ribonuclease Pac1
SPBC13A2.04c	SPBC13A2.04c	PTR family peptide transporter (predicted)
SPBC1539.06	SPBC1539.06	acyl-coenzyme A binding protein (predicted)
SPBC1703.13c	SPBC1703.13c	mitochondrial inorganic phosphate transporter (predicted)
SPBC18H10.02	lcf1	long-chain-fatty-acid-CoA ligase Lcf1
SPBC21C3.08c	car2	ornithine transaminase Car2
SPBC29A10.13	atp7	F0-ATPase subunit D (predicted)
SPBC29A3.18	cyt1	cytochrome c1 Cyt1 (predicted)
SPBC359.03c	aat1	amino acid transporter Aat1 (predicted)
SPBC3D6.02	but2	But2 family protein But2
SPBC409.08	SPBC409.08	spermine family transporter (predicted)
SPBC56F2.08c	SPBC56F2.08c	RNA-binding protein (predicted)
SPBC8E4.01c	SPBC8E4.01c	inorganic phosphate transporter (predicted)
SPBP4G3.02	pho1	acid phosphatase Pho1
SPBPB10D8.02c	SPBPB10D8.02c	arylsulfatase (predicted)
SPBPB7E8.01	SPBPB7E8.01	sequence orphan
SPBPJ4664.02	SPBPJ4664.02	cell surface glycoprotein (predicted)
SPCC1281.06c	SPCC1281.06c	acyl-coA desaturase (predicted)
SPCC1393.08	SPCC1393.08	transcription factor, zf-GATA type (predicted)
SPCC1795.06	map2	P-factor pheromone Map2
SPCC285.05	SPCC285.05	purine nucleoside transmembrane transporter (predicted)
SPCC330.03c	SPCC330.03c	NADPH-hemoprotein reductase (predicted)
SPCC338.10c	cox5	cytochrome c oxidase subunit V (predicted)
SPCC74.05	rpl2702	60S ribosomal protein L27 (predicted)
SPCC965.06	SPCC965.06	potassium channel subunit (predicted)
SPCP31B10.08c	rpl35a	60S ribosomal protein L35a
SPCPB1C11.03	SPCPB1C11.03	cysteine transporter (predicted)
SPNCRNA.130	omt3	non-coding RNA (predicted)
SPNCRNA.236	SPNCRNA.236	non-coding RNA (predicted)
SPNCRNA.25	prl25	antisense RNA (predicted)
